# Supplementary material for: A gene horizontally transferred from bacteria protects arthropods from host plant cyanide poisoning
Source: eLife journal article supplement (doi:10.7554/elife.02365), 2014-04-24
Supplement: supp [file elife_poa_e02365_Figure_2_figure_supplement_1.pdf › elife_poa_e02365_Figure_2_figure_supplement_1.pdf]

CYS

| Plants              |      | *****    |      |         |      |           |              |      |
|---------------------|------|----------|------|---------|------|-----------|--------------|------|
| <i>G. max</i>       | VKDR | EPTSGNTG | ERRI | V-----Q | LQQF | PANPKVHYE | FVSGICTGGTIT | GISS |
| <i>Z. mays</i>      | VKDR | EPTSGNTG | ERRI | V-----K | LQQF | PANPKIHYE | LVSGICTGGTIT | GISS |
| <i>A. thaliana</i>  | VKDR | EPTSGNTG | ERRI | I-----A | LQQF | PANPKIHYE | FVSGICTGGTIT | GISS |
| <i>S. tuberosum</i> | VKDR | EPTSGNTG | ERRI | I-----S | LQQF | PANPKIHYE | LASGICTGGTIT | GISS |
| Nematodes           |      |          |      |         |      |           |              |      |
| <i>C. elegans</i>   | VKDR | EPTSGNTG | ERRT | I-----D | LAQF | PNNPLVHYQ | VVFGVCTGGTIT | GISS |

CAS

| Plants                      |          |               |           |              |           |                |                   |           |
|-----------------------------|----------|---------------|-----------|--------------|-----------|----------------|-------------------|-----------|
| <i>G. max</i>               | -94-INKR | -121-EPTSGNMG | -153-ERRV | -178-V-----K | -194-LQQF | -200-PANTQVHFE | -225-FVMGICSGGTVS | -316-GISS |
| <i>Z. mays</i>              | VKDR     | EPTSGNMG      | ERRV      | V-----R      | LQQF      | PANVKVHYD      | FVMGICSGGTVT      | GISS      |
| <i>A. thaliana</i>          | INKR     | EPTSGNMG      | ERRV      | V-----K      | CQQF      | PANTQIHFD      | FVMGICSGGTVS      | GISS      |
| <i>S. tuberosum</i>         | INKR     | EPTSGNMG      | ERRV      | I-----K      | LQQF      | PANTQAHFE      | FVMGICSGGTVS      | GISS      |
| Nematodes                   |          |               |           |              |           |                |                   |           |
| <i>C. elegans</i>           | VKDR     | EPTSGNMG      | ERRC      | V-----Q      | LNQF      | PANPEAHYK      | VCFGVSGGCTCT      | GISS      |
| Bacterial donor             |          |               |           |              |           |                |                   |           |
| <i>S. stellata</i>          | VKDR     | EMTSGNMG      | ARAR      | VTGADVTAAD   | VDQF      | TEGIAAH-E      | FVAAVGTGSTYL      | GFSA      |
| <i>A. xylofidans</i>        | VKDR     | EMTSGNMG      | ARAR      | VTGADVEAAAR  | VDQF      | VECIAAHET      | WVAAVGTGCTFM      | GYSA      |
| <i>M. radiotolerans</i>     | VKDR     | EMTSGNMG      | QRAR      | VTGADVDAAD   | VNQF      | PECMRAHRE      | WVAAVGTGATFL      | GYSA      |
| <i>Methylobacterium</i> sp. | VKDR     | EMSSGNMG      | QRAR      | VTGADVAAAAE  | VDQF      | PEGVAIHRD      | WVASVGTGATFL      | GYSA      |

| Tetranychidae     |      |          |      |            |      |           |              |      |
|-------------------|------|----------|------|------------|------|-----------|--------------|------|
| <i>T. urticae</i> | INKR | EVTSGNQG | QRAI | VTADDVAAAE | VDQF | PTNCLAHYE | FLVGCSTGGCFV | GFTT |

| Lepidoptera           |      |          |      |             |      |            |              |      |
|-----------------------|------|----------|------|-------------|------|------------|--------------|------|
| <i>P. xylostella</i>  | INKR | EITSGNQG | QRAL | VTFADVVECEK | VNQF | PSNSLSHYK  | FVATMGTGGVFT | GYTS |
| <i>D. plexippus</i> 1 | INKR | EITSGNQG | QRAI | VTLSDVKAABE | VNQF | DMNSEAHYE  | FVATVGTAGTFA | GYTS |
| <i>D. plexippus</i> 2 | INKR | EITSGNQG | QRAI | VTLADVTAABE | VNQF | DMNSRAHYE  | FVAAVGTAGTFA | GYTS |
| <i>B. mori</i>        | INKR | EVTSGNQG | QRAI | VTLNDVKAVEE | VNQF | DANSESHYQ  | FVATVGTAGTFT | GYTS |
| <i>M. sexta</i>       | INKR | EVTSGNQG | QRAI | VTLADVKAABE | VNQF | DANAISHYE  | FVATVGTAGTFT | GYTS |
| <i>H. melpomene</i> 1 | INKR | EVTSGNQG | QRAI | VTLADVDAAKV | VNQF | PMDVDAAHYA | FIATVGTAGTFS | GYTS |
| <i>H. melpomene</i> 2 | INKR | EVTSGNQG | QRAI | VTLADQAQAEK | VNQF | QMNADAHYC  | FIATVGTAGTFV | GYTS |
| <i>H. melpomene</i> 3 | INKR | EVTSGNQG | QRAI | VTLADVKAABE | VNQF | QMNADAHYY  | FVATVGTAGTFT | GYTS |
