# Supplementary figures and images for: A gene horizontally transferred from bacteria protects arthropods from host plant cyanide poisoning
Source: eLife journal article supplement (doi:10.7554/elife.02365), 2014-04-24

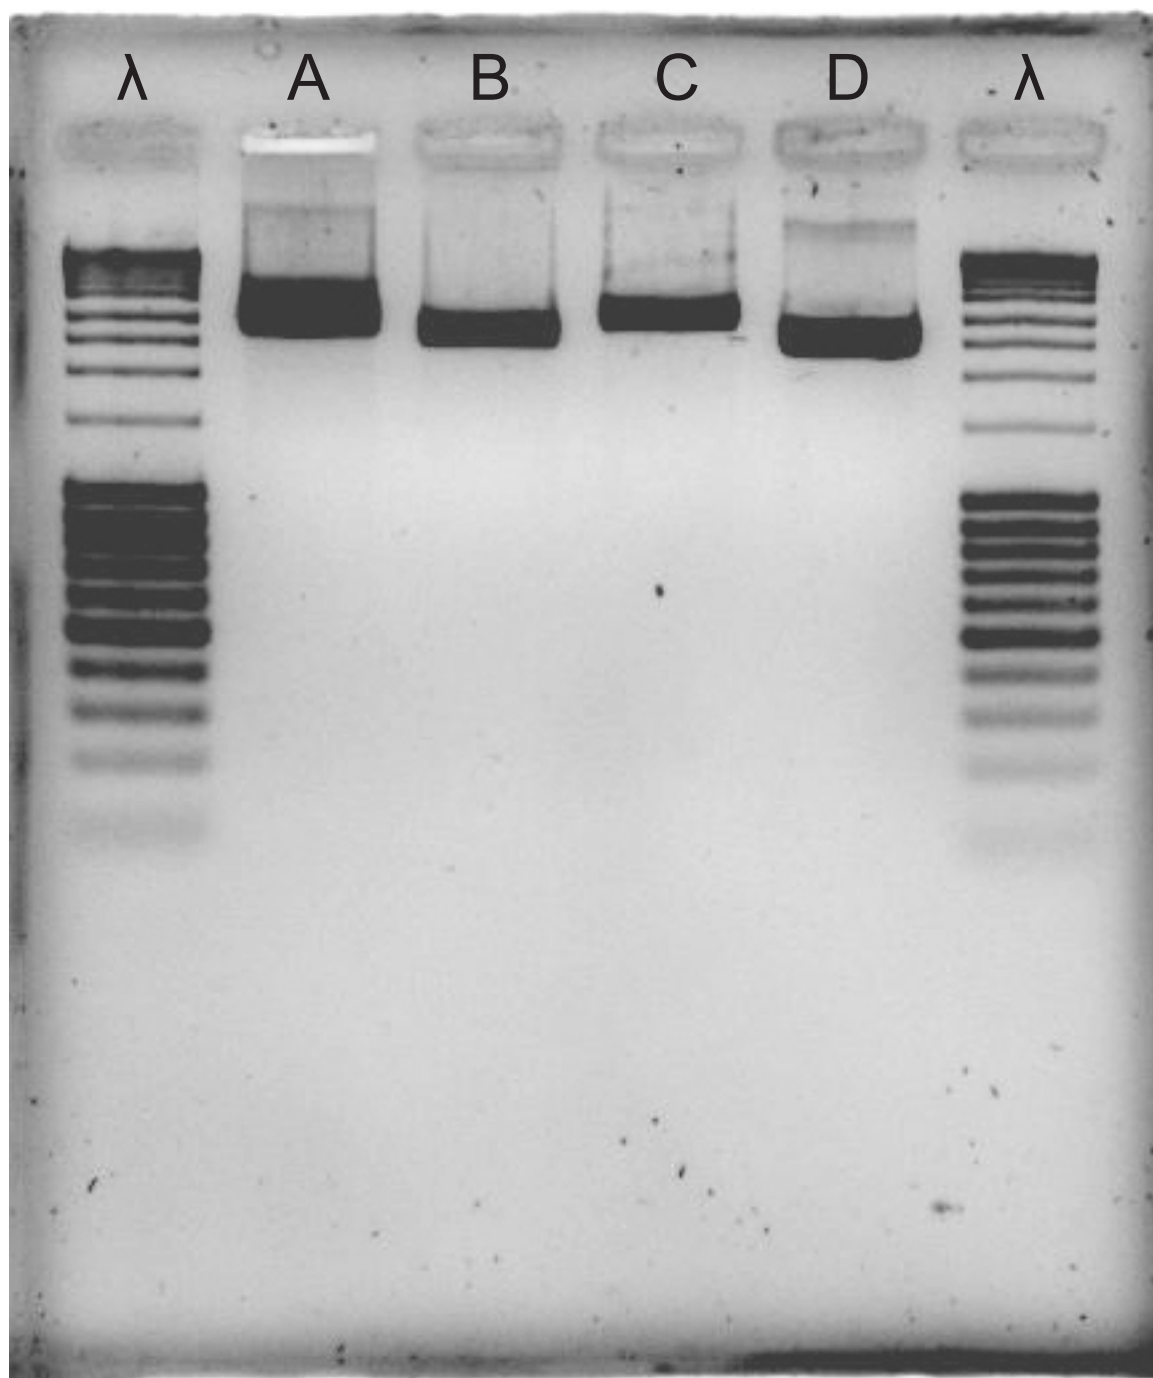

Supplement: supp [file elife_poa_e02365_Figure_4_figure_supplement_1.pdf › elife_poa_e02365_Figure_4_figure_supplement_1.pdf]
